# Supplementary material for: Graphene-Based Steganographic Aptasensor for Information Computing and Monitoring Toxins of Biofilm in Food
Source: PubMed Central journal article supplement (PMC7010922; doi:10.3389/fmicb.2019.03139), 2020-02-04
Supplement: Table_1.pdf [file Table_1.pdf]

## *Supplementary Material*

**Table S1.** Reported LOD for ZEN and OTA detection.

| Target | Methods                                | LOD         | Linear range      | Ref.              |
|--------|----------------------------------------|-------------|-------------------|-------------------|
| ZEN    | Molecularly imprinted polymers         | 2.09 ng/kg  | 6.25–250 ng/kg    | Huang et al.      |
|        | Aptasensor                             | 1 fg/mL     | 10 fg/mL-10 ng/mL | Luo et al.        |
|        | Lateral Flow biosensor                 | 20 ng/mL    | 5–200 ng/mL       | Wu et al.         |
|        | Aptasensor                             | 0.5 ng/mL   | 0.5 to 64 ng/mL   | Yugender et al.   |
|        | High performance liquid chromatography | 5 µg/kg     | None              | Ren et al.        |
| OTA    | ELISA assay                            | 40 pg/mL    | 5.0–640 pg/mL     | Pei et al.        |
|        | Aptasensor                             | 0.098 nM    | None              | Taghdisi et al.   |
|        | SPR sensor                             | 18 pg/mL    | None              | Aleksandra et al. |
|        | Immunosensor                           | 14.86 pg/mL | 0.015-0.4ng/mL    | Li et al.         |

**Reference:**

Aleksandra Karczmarczyk, Ciril Reiner-Rozman, Simone Hageneder, Monika Dubiak-Szepietowska, & Karl-Heinz Feller. (2016). Fast and sensitive detection of ochratoxin a in red wine by nanoparticle-enhanced spr. *Analytica Chimica Acta*, 937, 143-150.

Huang., Z., He, J., Li, Y., Wu, C., You, L., Wei, H., Li, K., & Zhang, S. (2019). Preparation of dummy molecularly imprinted polymers for extraction of Zearalenone in grain samples. *J Chromatog A*, 1602, 11-18. doi:10.1016/j.chroma.2019.05.022

Li, M. , Liu, R. , Zhu, L. , & Chen, Z. . (2017). Development of ochratoxin a in cereal by chemiluminescence enzyme immunoassay. *IOP Conference Series Earth and Environmental Science*, 94(1), 012018.

Luo, L. J., Ma, S., Li, L. B., Liu, X. H., Zhang, J. Y., Li, X., Liu, D., & You, T. Y. (2019). Monitoring zearalenone in corn flour utilizing novel self-enhanced electrochemiluminescence aptasensor based on NGQDs-NH<sub>2</sub>-Ru@SiO<sub>2</sub> luminophore. *Food Chemistry*, 292, 98-105. doi:10.1016/j.foodchem.2019.04.050

Pei, K., Xiong, Y., Xu, B., Wu, K., Li, X., Jiang, H., & Xiong, Y. (2018). Colorimetric ELISA for ochratoxin A detection based on the urease-induced metallization of gold nanoflowers. *Sensors and Actuators B: Chemical*, 262, 102-109. doi:https://doi.org/10.1016/j.snb.2018.01.193

Ren, DD., , Shao-Hui, L. I. , Yun-Feng, X. , & Yong-Tan, Y. . (2015). Improvement research on determination of zearalenone in grain by high performance liquid chromatography. *Journal of Food Safety & Quality*.

Taghdisi, S. M. , Danesh, N. M. , Beheshti, H. R. , Ramezani, M. , & Abnous, K. . (2016). A novel fluorescent aptasensor based on gold and silica nanoparticles for ultrasensitive detection of ochratoxin a. *Nanoscale*, 8(6), 3439-3446.

Wu, S., Liu, L., Duan, N., Li, Q., Zhou, Y., & Wang, Z. (2018). Aptamer-Based Lateral Flow Test Strip for Rapid Detection of Zearalenone in Corn Samples. *Journal of Agricultural and Food Chemistry*, 66(8), 1949-1954. doi:10.1021/acs.jafc.7b05326

Yugender Goud, K., Hayat, A., Satyanarayana, M., Sunil Kumar, V., Catanante, G., Vengatajalabathy Gobi, K., & Marty, J. L. (2017). Aptamer-based zearalenone assay based on the use of a fluorescein label and a functional graphene oxide as a quencher. *Microchimica Acta*, 184(11), 4401-4408. doi:10.1007/s00604-017-2487-6
